# Supplementary material for: Tailoring the electronic structure by constructing the heterointerface of RuO2–NiO for overall water splitting with ultralow overpotential and extra-long lifetime
Source: Royal Society of Chemistry journal article supplement (doi:10.1039/d0ta06565j), 2020-01-01
Supplement: d0ta06565j1.pdf [file d0ta06565j1.pdf]

## Supporting Information

### Tailoring the electric structure by constructing the heterointerface of RuO<sub>2</sub>-NiO for overall water splitting with ultralow overpotential and extra-long lifetime over 2000 hours at 1000 mA/cm<sup>2</sup>

Gengwei Zhang,<sup>a</sup> Bin Wang,<sup>a\*</sup> Lu Li,<sup>a</sup> Sen Yang,<sup>a</sup> Jiamei Liu<sup>b</sup> and Shengchun Yang<sup>a\*</sup>

<sup>a</sup> School of Science, MOE Key Laboratory for Non-equilibrium Synthesis and Modulation of Condensed Matter, State Key Laboratory for Mechanical Behavior of Materials, Xi'an Jiaotong University, No. 28 West Xianning Road, Xi'an 710049, China

<sup>b</sup> Instrument Analysis Center of Xi'an Jiaotong University, Xi'an Jiaotong University, No.28, Xianning West Road, Xi'an, Shaanxi, 710049, China  
E-mail: bin\_wang@xjtu.edu.cn (B. Wang); ysch1209@mail.xjtu.edu.cn. (S. Yang)

## EXPERIMENTAL

**Materials.** KOH and RuO<sub>2</sub> were purchased from MACKLIN Reagent Co. RuCl<sub>3</sub> was obtained from the Kunming institute of precious metals. Nickel foam, Pt/C was purchased from Alfa Aesar Chemical Reagent Co. All chemicals were used as received without further purification. Ultrapure water (18.2 MΩ cm) was used in all the experiments.

## Characterizations

The structural characterization was investigated by X-ray diffraction on a Bruker-AXS D8 Advance diffractometer using Cu Kα radiation ( $\lambda = 1.5418 \text{ \AA}$ ). The morphology of the as-produced samples was characterized by scanning electron microscope (FEI Quanta, FEG 250, energy spectrum: EDAX, Apollo XL-SDD). The TEM images of the products were recorded on a JEOL JEM-2100 transmission electron microscope. High-angle annular dark-field scanning transmission electron microscopy and energy-dispersive X-ray spectroscopy mapping were determined by JEOL JEM-F200. The chemical state of the samples was measured by the X-ray photoelectron spectroscopy

(Kratos, AXIS ULtrabl). The composition of the catalyst was determined by inductively coupled plasma emission spectroscopy (ICP-AES 5300). The RuO<sub>2</sub>-NiO/NF sample was dissolved in a Teflon-lined stainless steel reactor with aqua regia at 180 °C for 8 h<sup>1</sup>. The concentration of the Ru and Ni dissolved in the electrolyte during the water electrolysis was determined by ICP-AES. The electrolyte of each 100 h was transferred into volumetric flask to make 100 mL, and examined by ICP-OES analysis

### **Model and computation detail**

The calculations were carried out with the density functional theory (DFT) as implemented in the Vienna ab initio simulation package (VASP). The exchange-correlation functional was described within the generalized gradient approximation (GGA) parameterized by the Perdew-Burke-Ernzerhof (PBE). The vdW correction was considered by employing the Grimme's D3. To describe the interactions between valence electrons and the ion core. The cut-off energy for the plane-wave basis was set to 400 eV. To better describe Coulomb interaction in the localized 3d orbitals and magnetic interaction, an effective U of 5.3 eV for Ni d-states was used in this study<sup>2,3</sup>. A vacuum region of 15 Å perpendicular to the surface was applied to avoid interaction between neighboring surfaces. Atoms were relaxed until the Hellmann-Feynman forces acting on them were less than 0.02 eV/Å. NiO was modeled as a (2 × 2) surface unit cell of three-layered NiO (100). RuO<sub>2</sub> was modeled as a (2 × 2) surface unit cell of three-layered RuO<sub>2</sub> (110). To simulate the RuO<sub>2</sub>-NiO interface, an inverse model was used in which a NiO ribbon was deposited on a three-layer RuO<sub>2</sub> (110) slab<sup>2</sup>. The Brillouin zone was sampled by a (3×3×1) Gamma-centered k-mesh. The reaction barriers of water dissociation were determined by climbing-image nudged elastic band method, with six images placed between the reactant and product geometries<sup>4</sup>. The adsorption free energy for adsorbates ( $\Delta G_{ads}$ ) in HER and OER can be calculated by the following equation:

$$\Delta G_{ads} = \Delta E_{ads} + \Delta E_{ZPE} - T\Delta S \quad (1)$$

where  $\Delta E_{ads}$  is the adsorption energy of adsorbates, and  $T$  is temperature.  $\Delta E_{ZPE}$  and  $\Delta S$  are the energy difference in zero point energy and entropy, respectively, which were obtained based on vibration analysis. The hydrogen adsorption free energy ( $\Delta G_{H^*}$ ) is expressed as

$$\Delta G_{H^*} = \Delta E_{H^*} + \Delta E_{ZPE} - T\Delta S \quad (2)$$

the  $\Delta E_{H^*}$  can be calculated from

$$\Delta E_{H^*} = E(H^*) - E(*) - 1/2E_{H_2} \quad (3)$$

where  $E(H^*)$  and  $E(*)$  are the DFT energies of the given surface with and without H adsorption respectively and  $E(H_2)$  is the DFT energy of a molecular  $H_2$  in gas phase.

OER activity is evaluated by the following four elementary steps<sup>5</sup>.

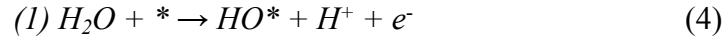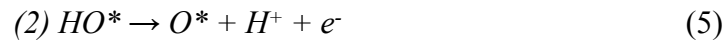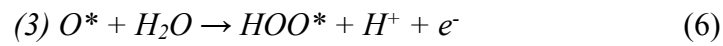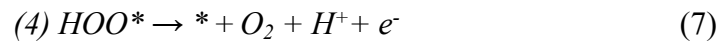

The adsorption energy of intermediates ( $O^*$ ,  $OH^*$ ,  $OOH^*$ ) on ( $*$ ) substrate were determined by the following approach of Nøeskov et al<sup>5</sup>.

$$\Delta E_{O^*} = E_{OH^*} - E_{(*)} - (E_{H_2O} - 1/2E_{H_2}) \quad (8)$$

$$\Delta E_{OH^*} = E_{O^*} - \Delta E_{(*)} - (E_{H_2O} - E_{H_2}) \quad (9)$$

$$\Delta E_{OOH^*} = E_{OOH^*} - \Delta E_{(*)} - (2E_{H_2O} - 3/2E_{H_2}) \quad (10)$$

Where  $E_{(*)}$ ,  $E_{HO^*}$ ,  $E_{O^*}$ , and  $E_{HOO^*}$  are the total energies of the pure surface and the adsorbed surface with  $HO^*$ ,  $O^*$ , and  $HOO^*$ , respectively,  $E_{H_2O}$  are the computed energies for the sole  $H_2O$  molecule. The Gibbs free energy changes for steps 4-7 can be expressed as follows:

$$\Delta G_1 = \Delta G_{OH^*} - eU \quad (11)$$

$$\Delta G_2 = \Delta G_{O^*} - \Delta G_{OH^*} - eU \quad (12)$$

$$\Delta G_3 = \Delta G_{OOH^*} - \Delta G_{O^*} - eU \quad (13)$$

$$\Delta G_4 = 4.92 - \Delta G_{OOH^*} - eU \quad (14)$$

Where  $U$  is the applied voltage. The theoretical overpotentials ( $\eta$ ) for OER can be calculated by the following equations:

$$G_{OER} = \max \{ \Delta G_1, \Delta G_2, \Delta G_3, \Delta G_4 \} \quad (15)$$

$$\eta = G_{OER} / e - 1.23 \text{ V} \quad (16)$$

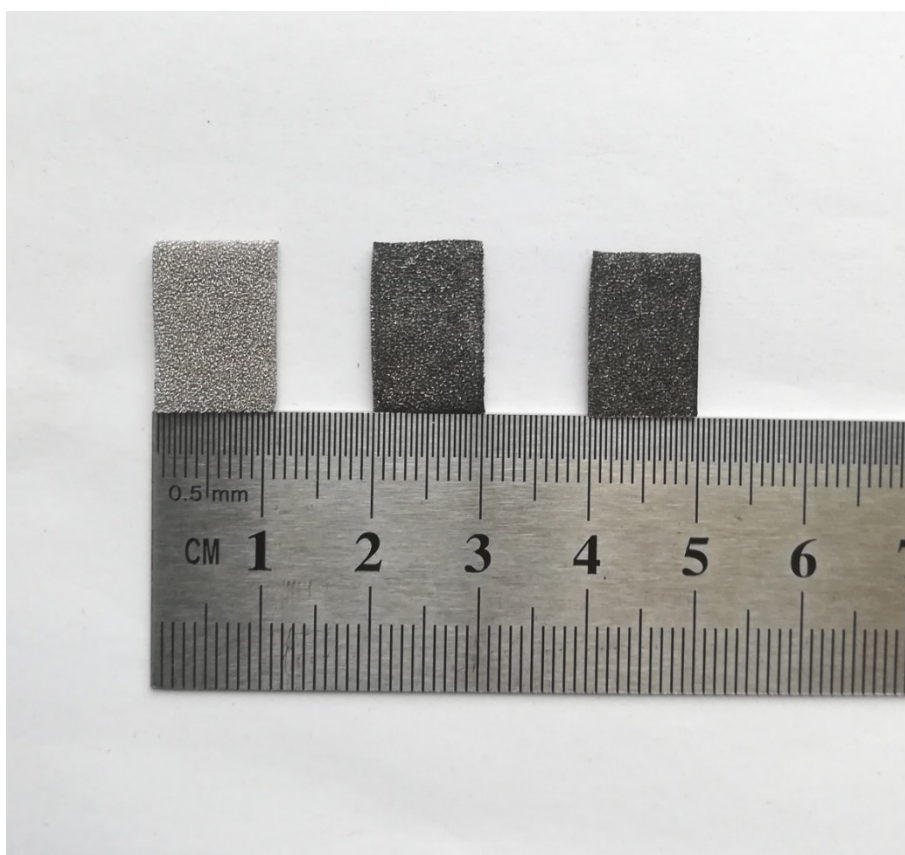

**Fig. S1** Photo of bare NF, pre-RuO<sub>2</sub>-NiO/NF and RuO<sub>2</sub>-NiO/NF from left to right.

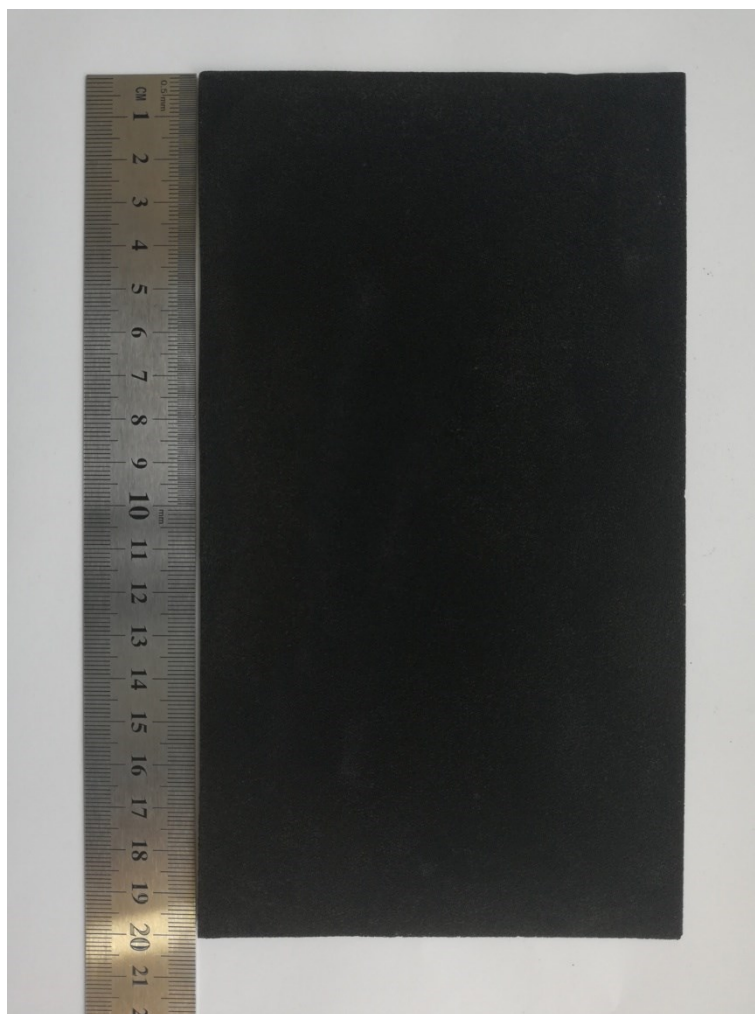

**Fig. S2** Photo of the RuO<sub>2</sub>-NiO/NF with an area of 200 cm<sup>2</sup>.

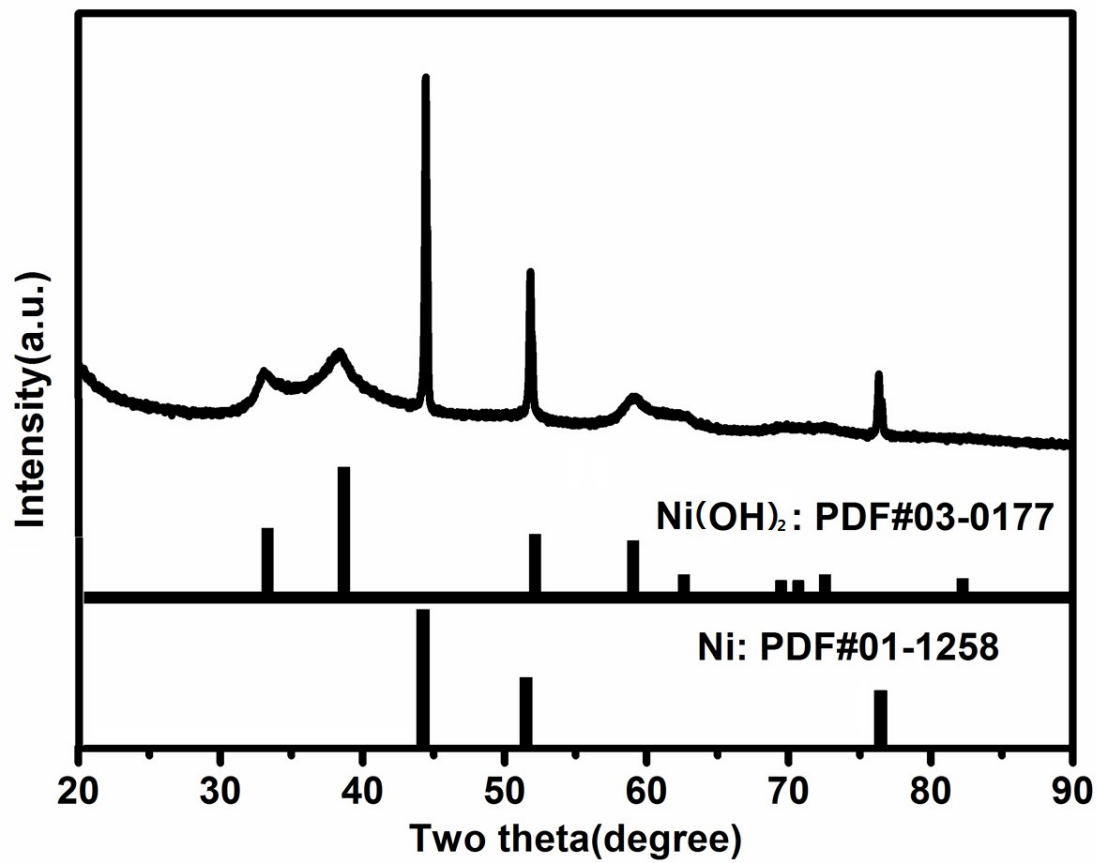

Fig. S3 XRD pattern of pre-RuO<sub>2</sub>-NiO/NF.

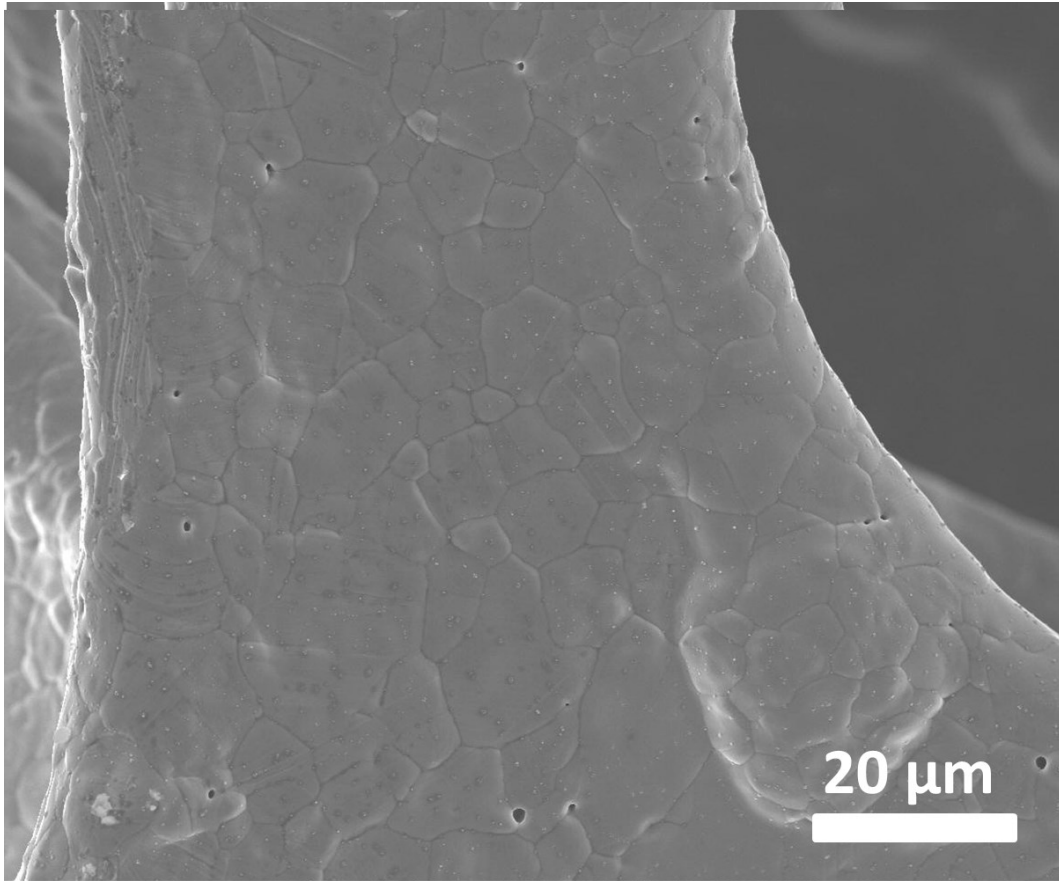

**Fig. S4** SEM image of blank nickel foam.



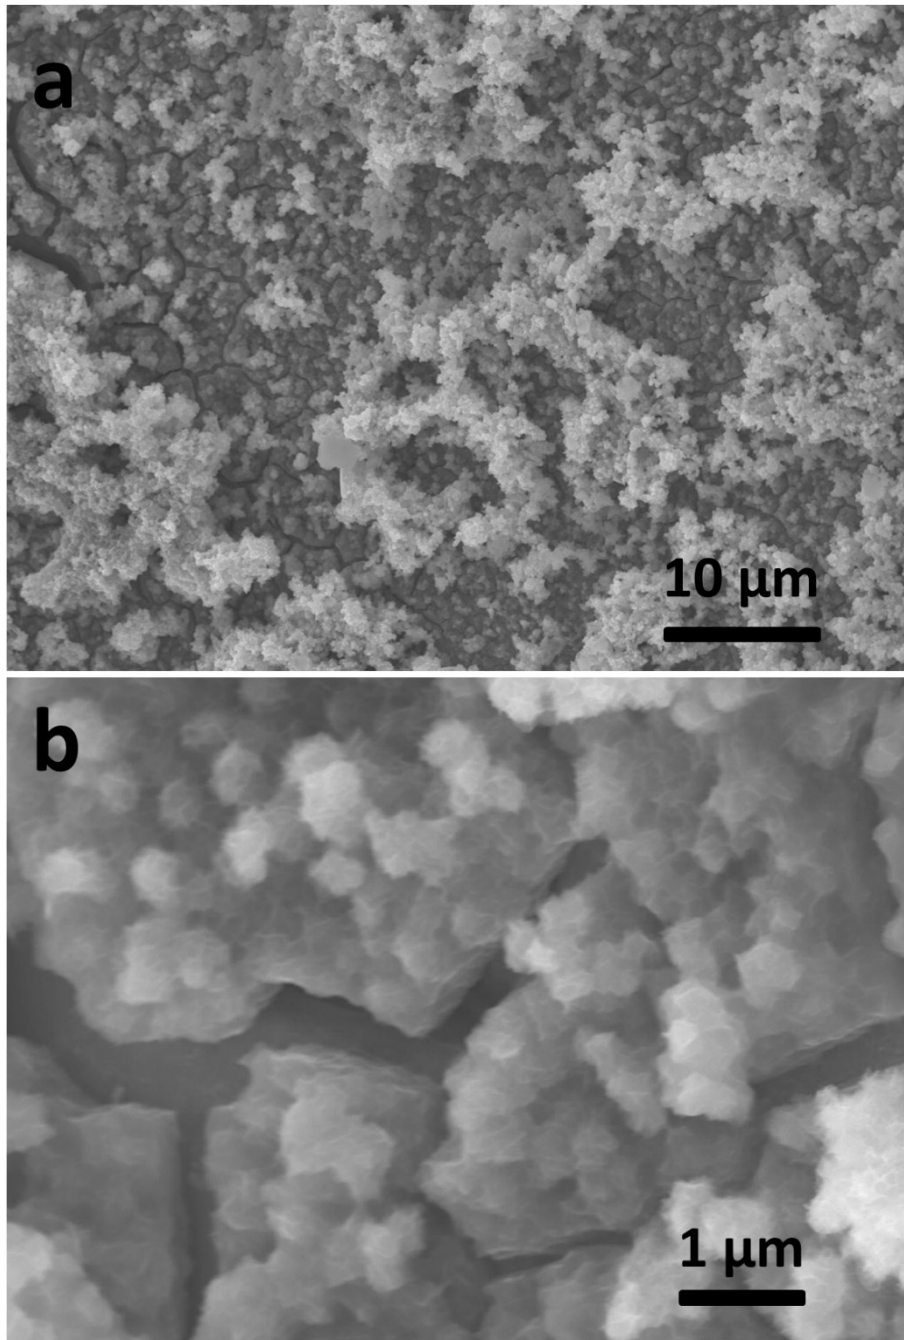

**Fig. S5** Low and high magnification SEM images of pre-RuO<sub>2</sub>-NiO/NF.

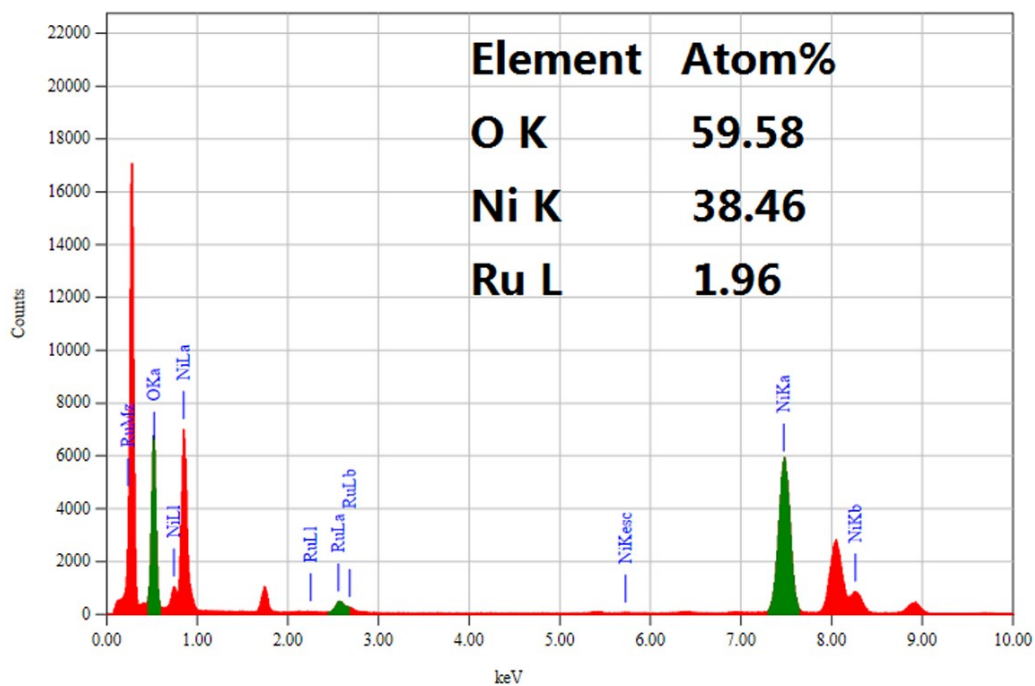

Fig. S6 The EDX spectrum of RuO<sub>2</sub>-NiO nanoparticles.

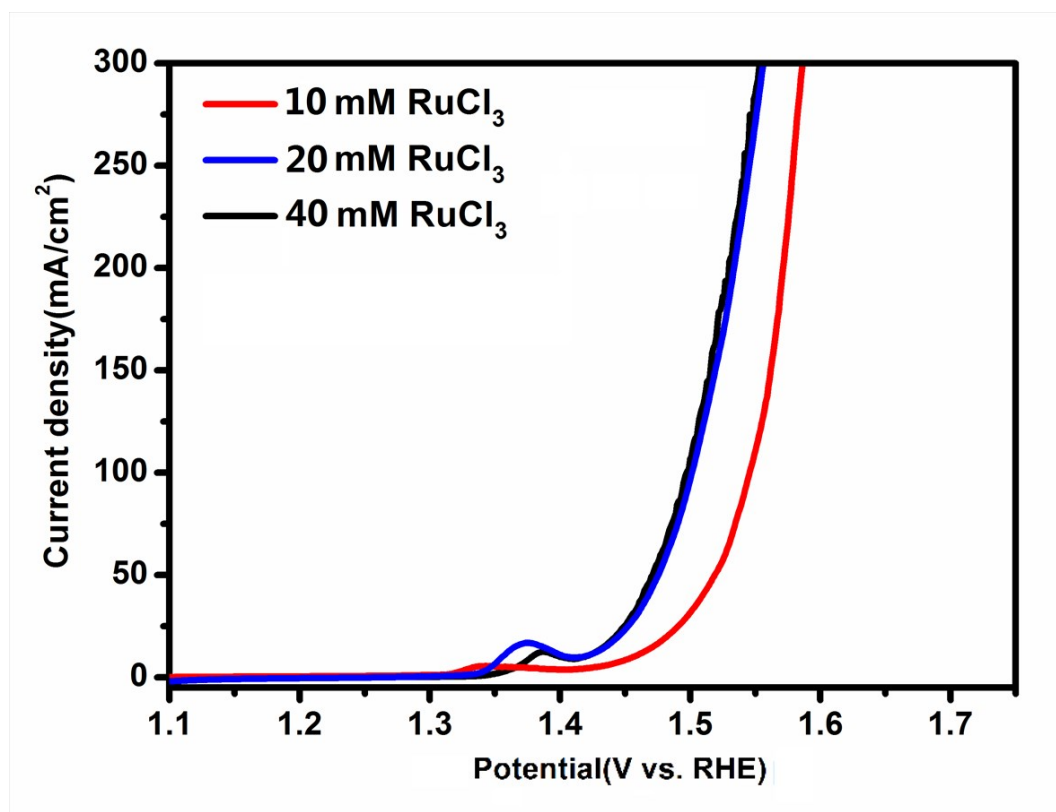

Fig. S7 The LSV curves of RuO<sub>2</sub>-NiO/NF with different RuO<sub>2</sub> loading amount for OER in 1 M KOH.

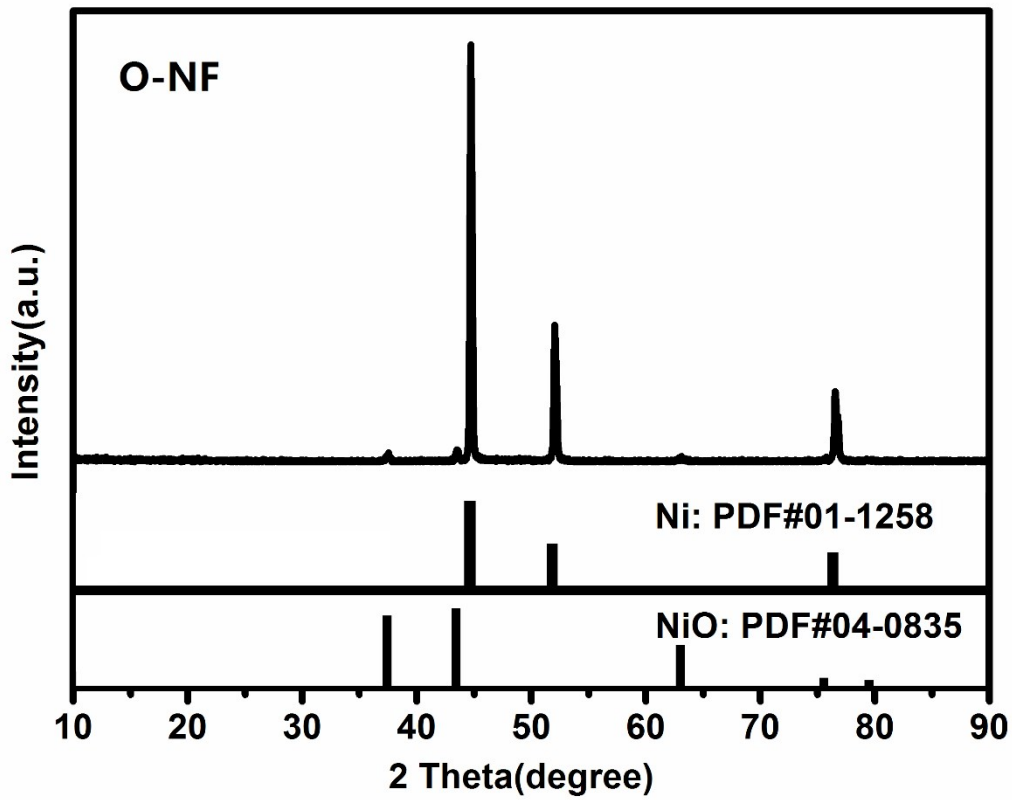

Fig. S8 XRD pattern of O-NF.

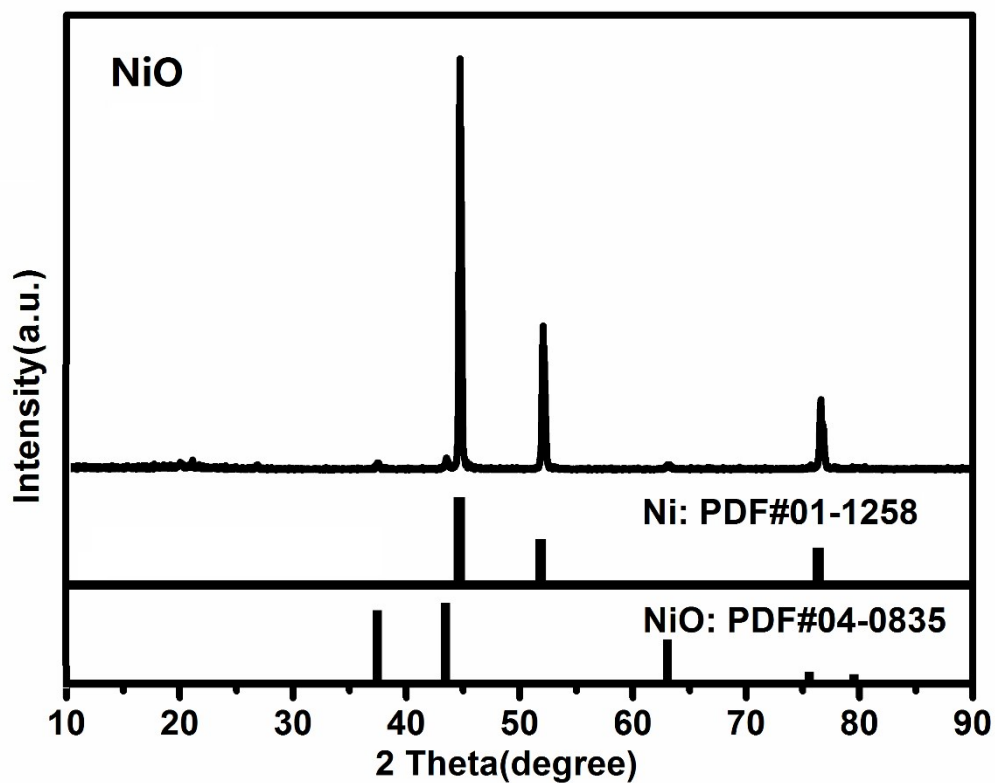

Fig. S9 XRD pattern of NiO/NF.

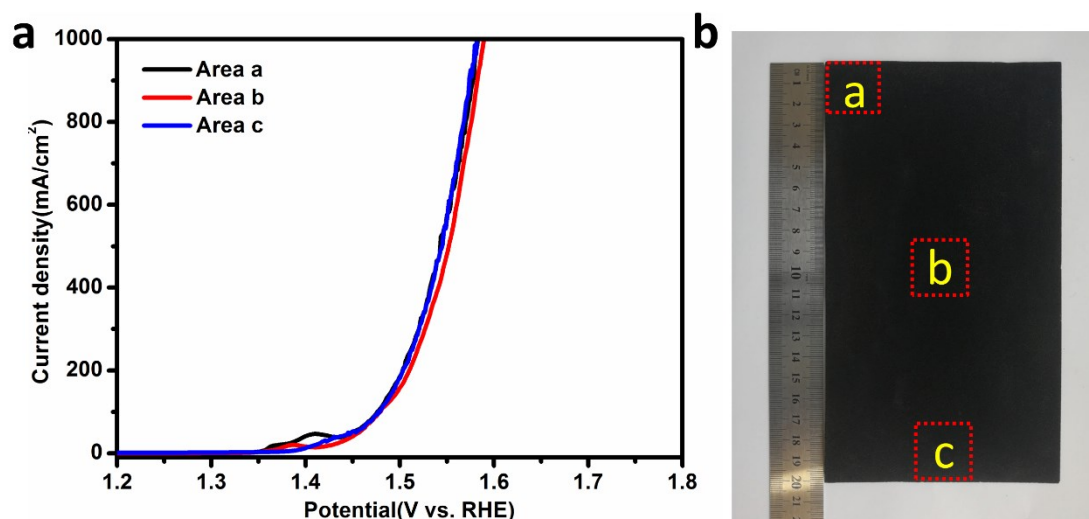

Fig. S10 The LSV curves of different part of RuO<sub>2</sub>-NiO/NF prepared with a large area.

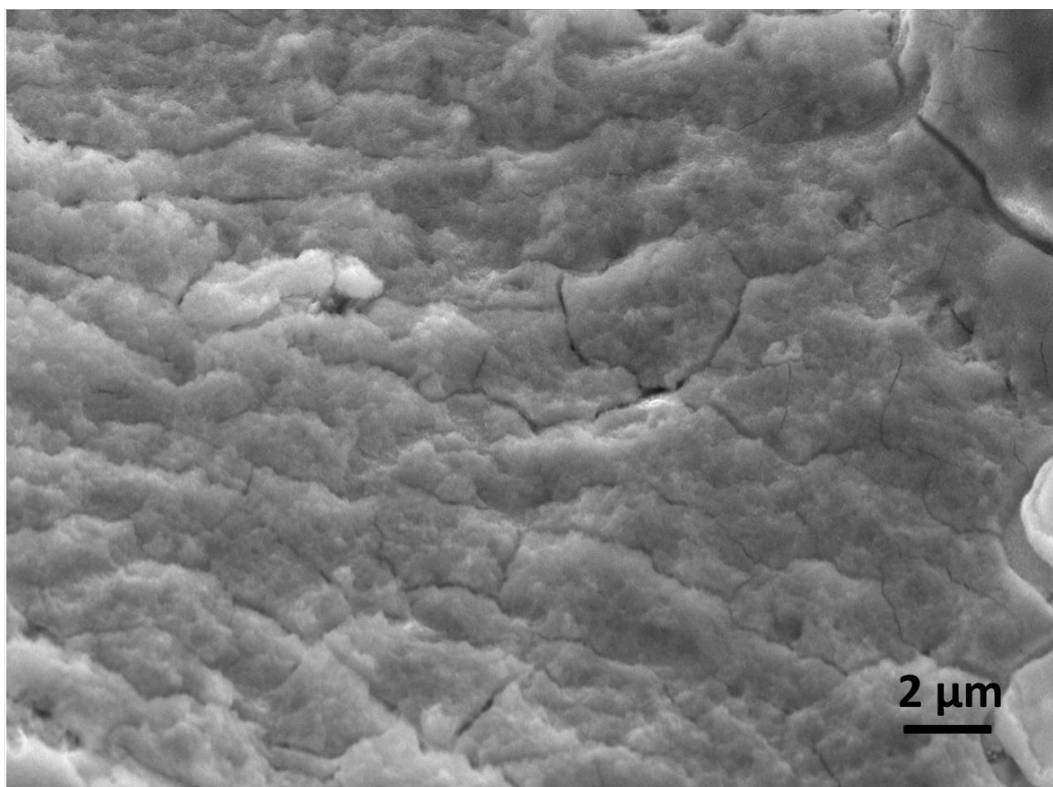

**Fig. S11** The SEM image of RuO<sub>2</sub>-NiO/NF after the OER stability test.

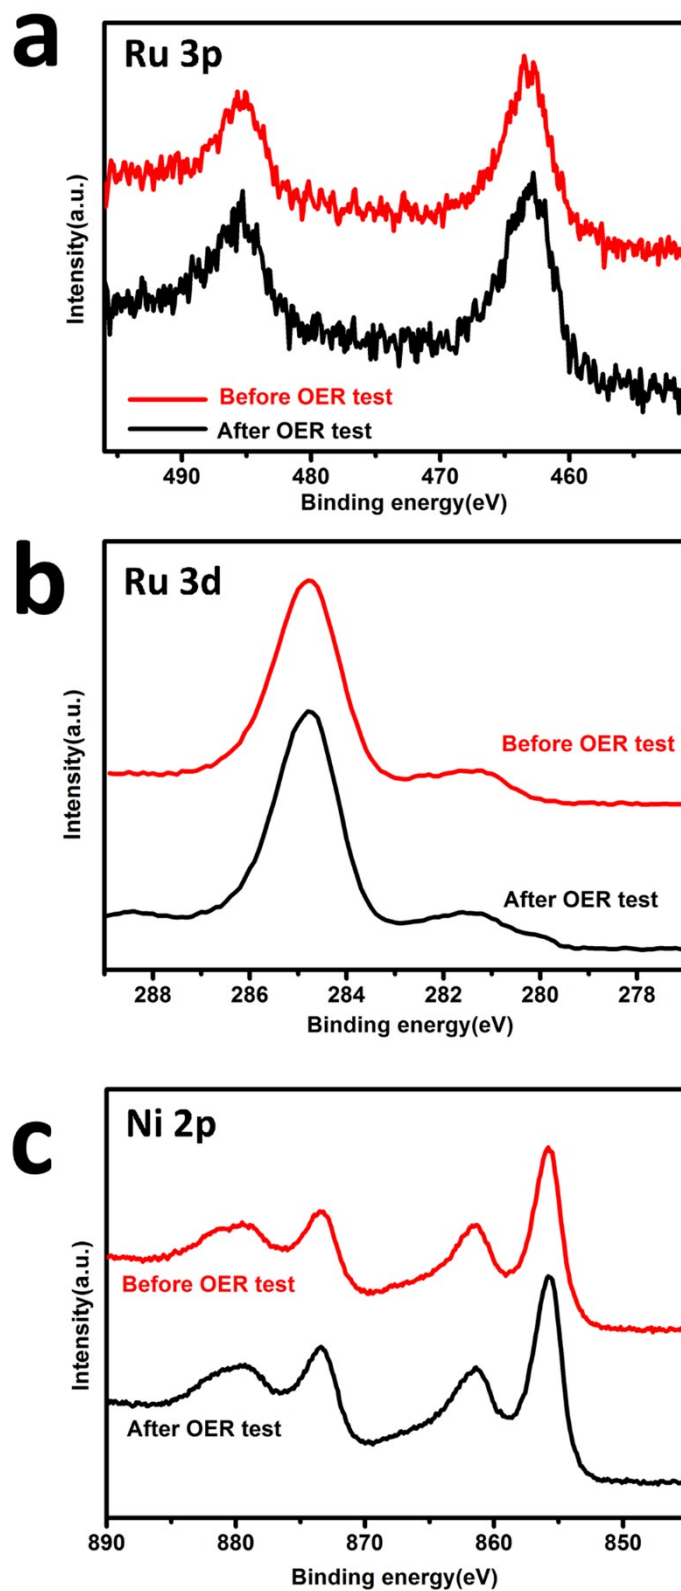

**Fig. S12** High-resolution XPS spectra of (a) Ru 3p, (b) Ru 3d and (c) Ni 2p of RuO<sub>2</sub>-NiO/NF before and after OER test, respectively.

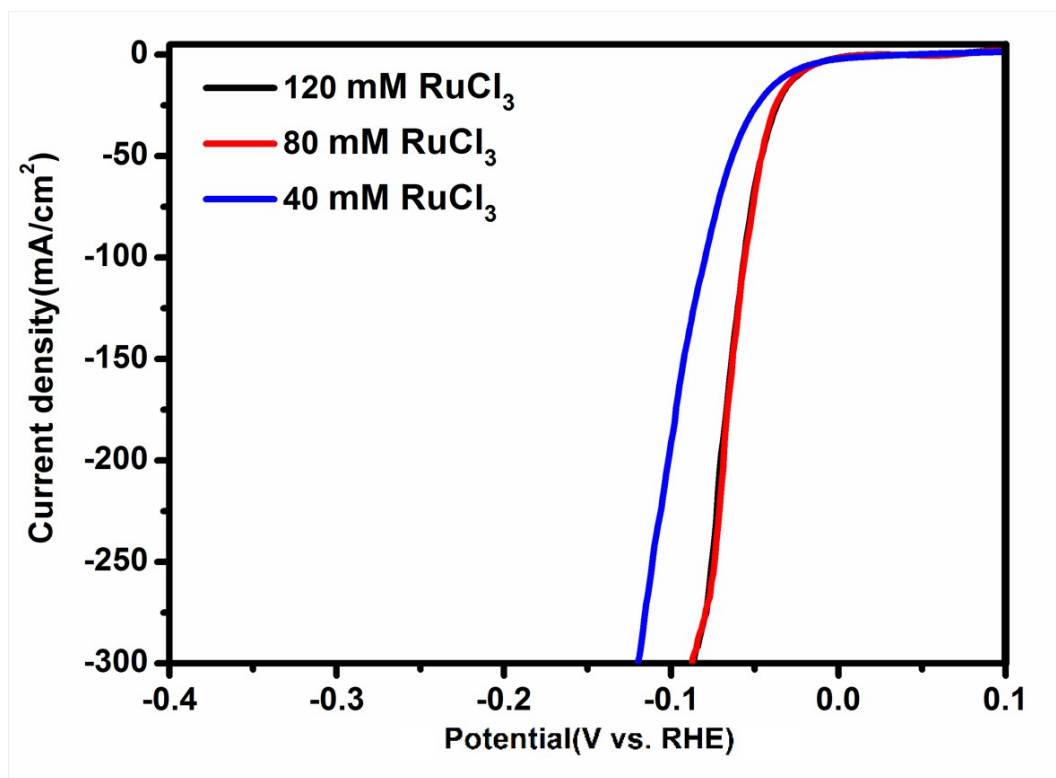

**Fig. S13** The LSV curves of RuO<sub>2</sub>-NiO/NF with different RuO<sub>2</sub> loading amount for HER in 1 M KOH.

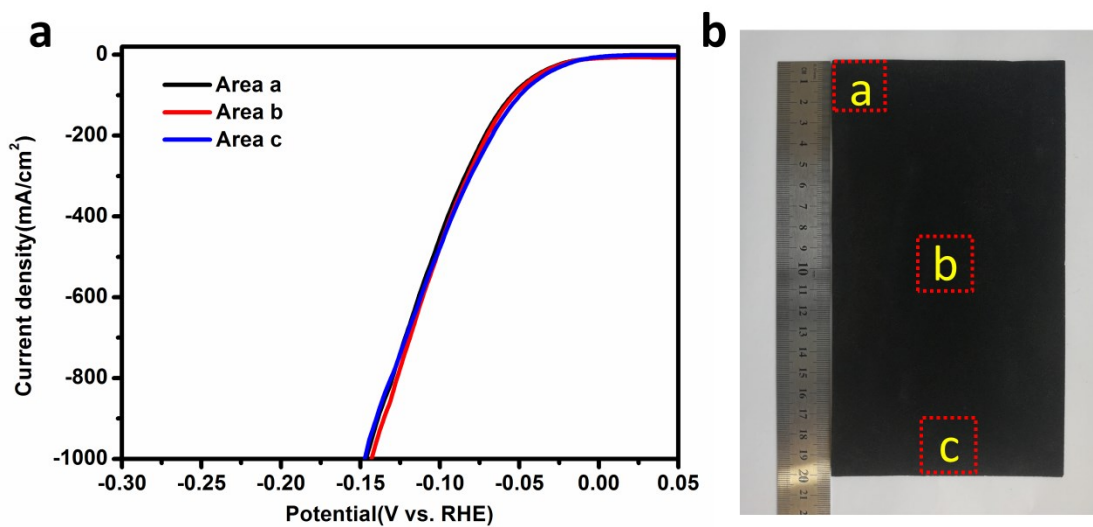

**Fig. S14** The LSV curves of different part of RuO<sub>2</sub>-NiO/NF prepared with a large area.

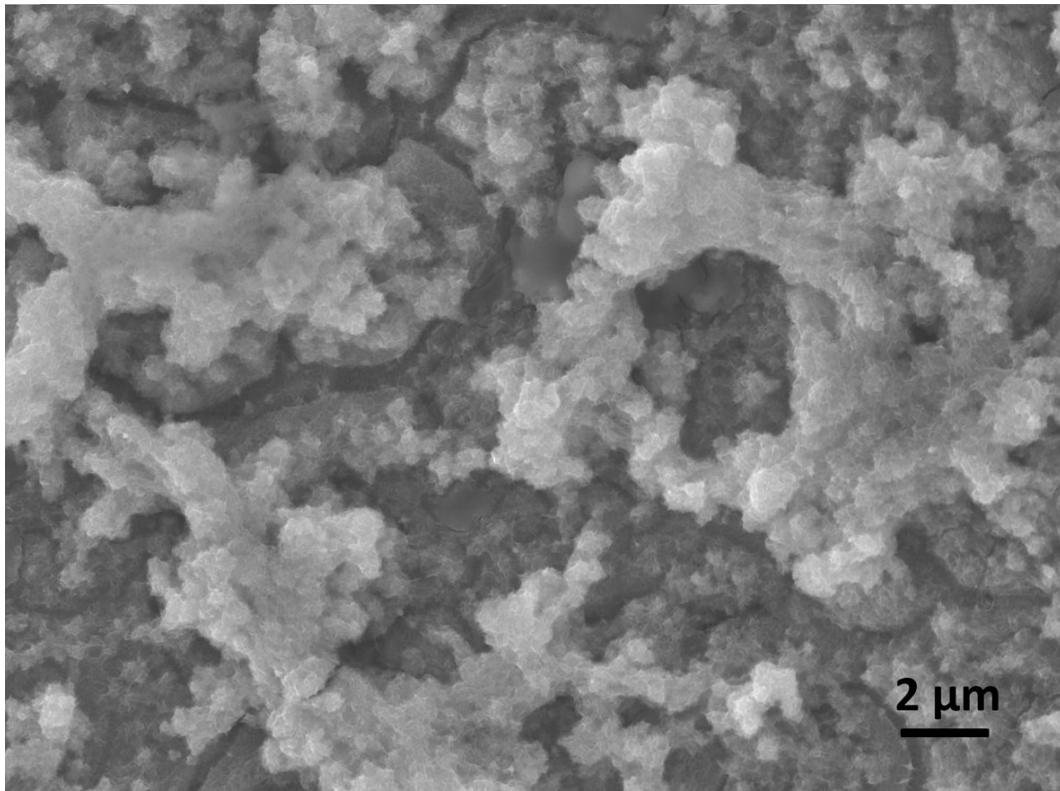

**Fig. S15** The SEM image of RuO<sub>2</sub>-NiO/NF after the HER stability test.



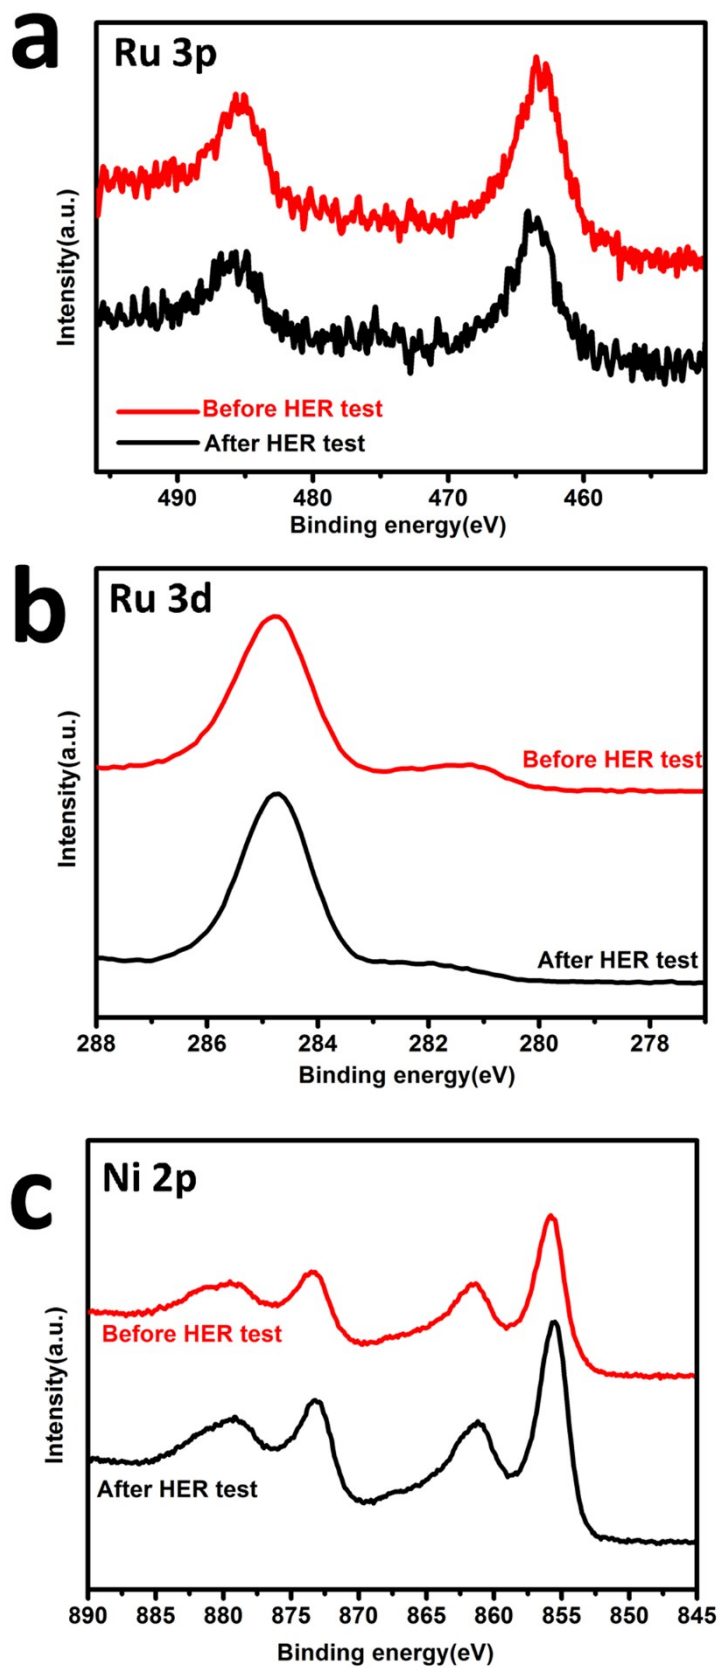

**Fig. S16** The high-resolution XPS spectra of (a) Ru 3p, (b) Ru 3d and (c) Ni 2p of RuO<sub>2</sub>-NiO/NF before and after HER test.

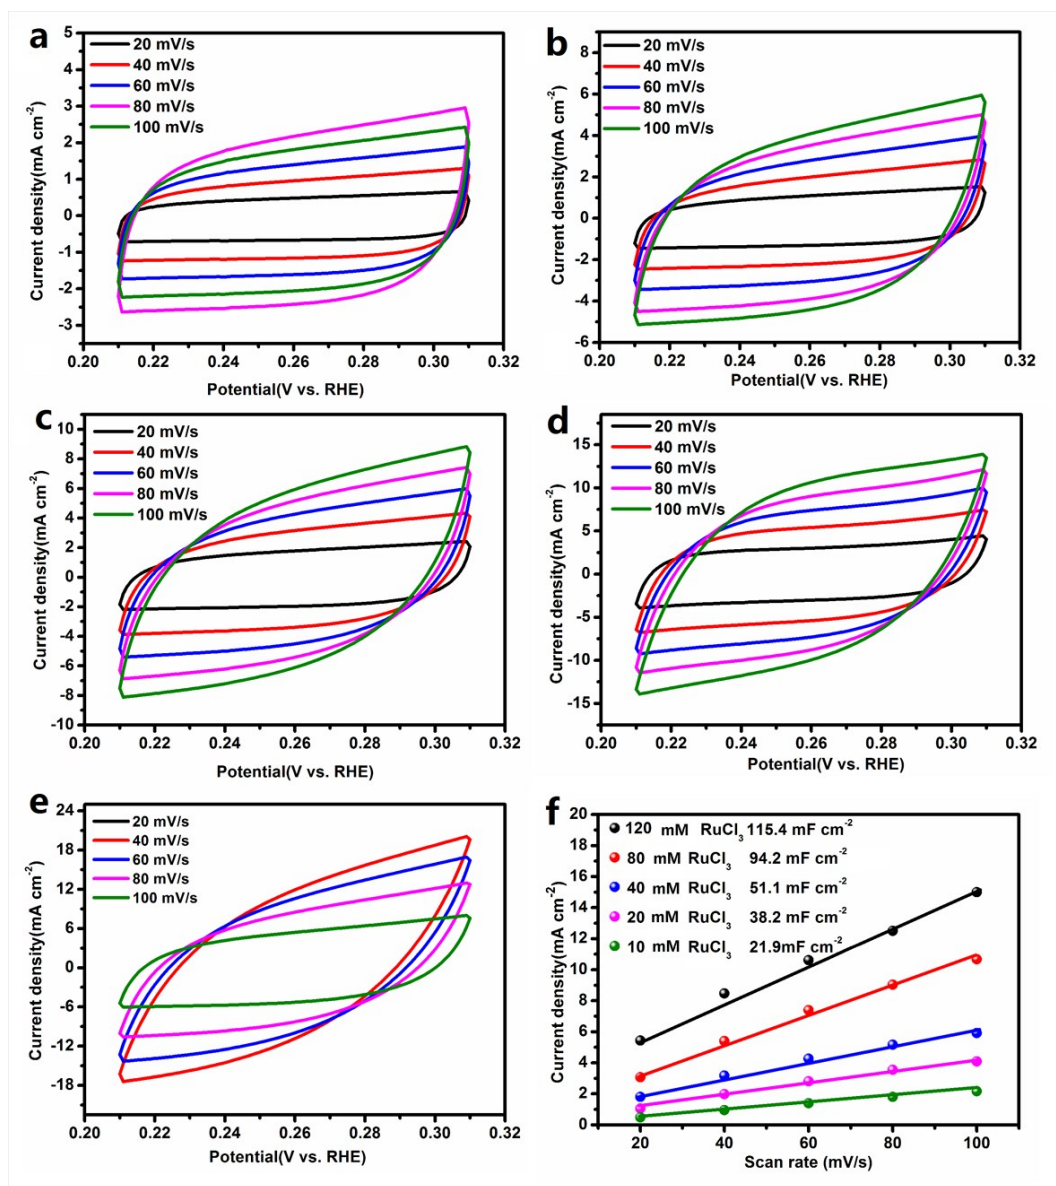

**Fig. S17** The double layer capacitances ( $C_{dl}$ ) of RuO<sub>2</sub>-NiO/NF with different RuO<sub>2</sub> loading amount.

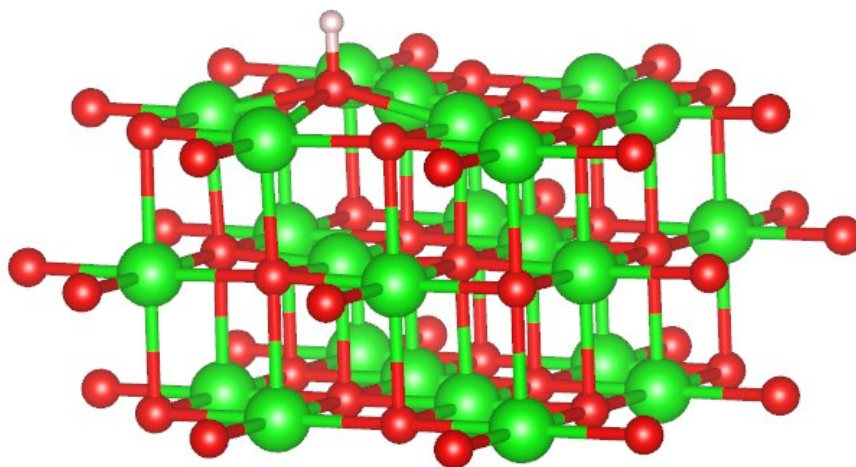

**Fig. S18** The optimized geometry of adsorption structure of H on NiO (100).

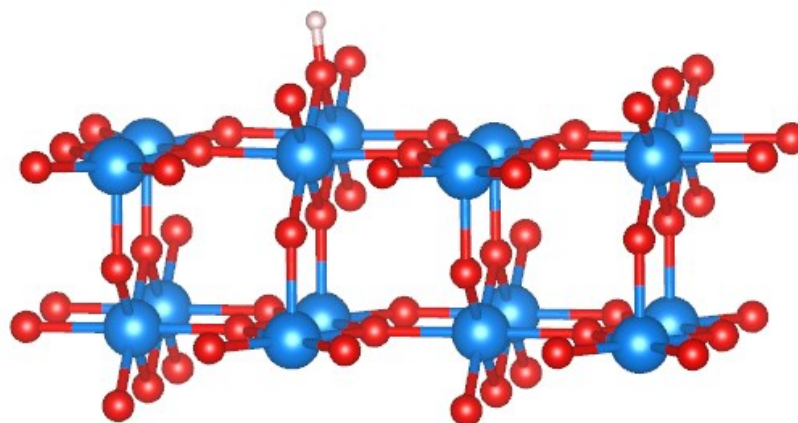

**Fig. S19** The optimized geometry of adsorption structure of H on RuO<sub>2</sub> (110).

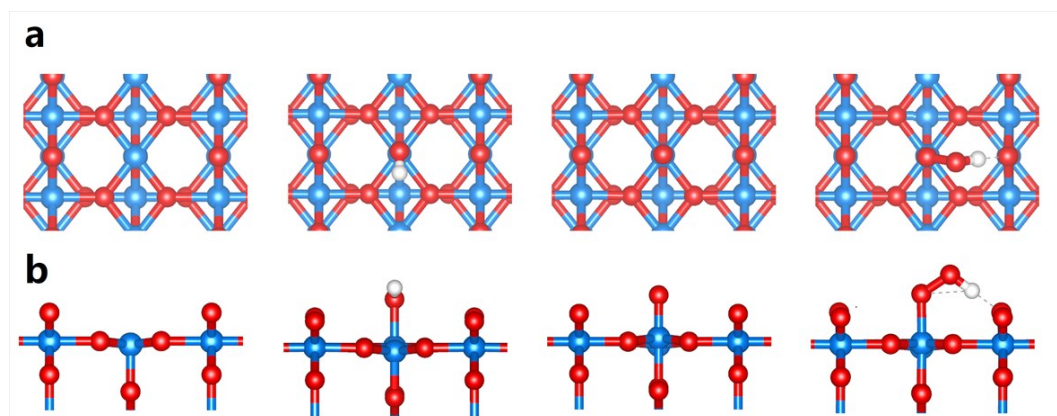

**Fig. S20** The (a) top view and (b) side view of the optimized geometry of adsorption structure of OH, O and OOH intermediates on RuO<sub>2</sub> (110).

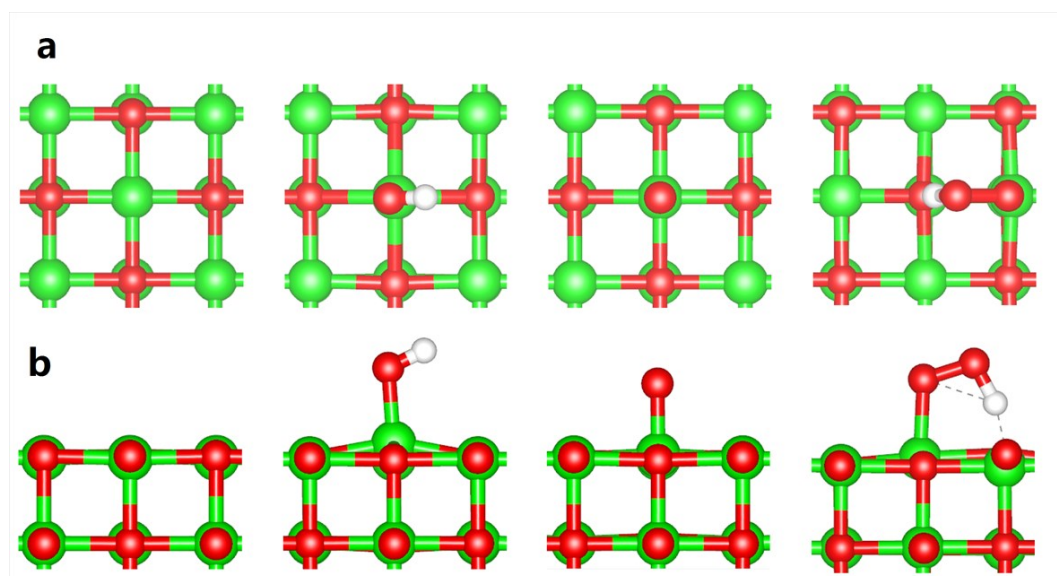

**Fig. S21** The (a) top view and (b) side view of the optimized geometry of adsorption structure of OH, O and OOH intermediates on NiO (100).

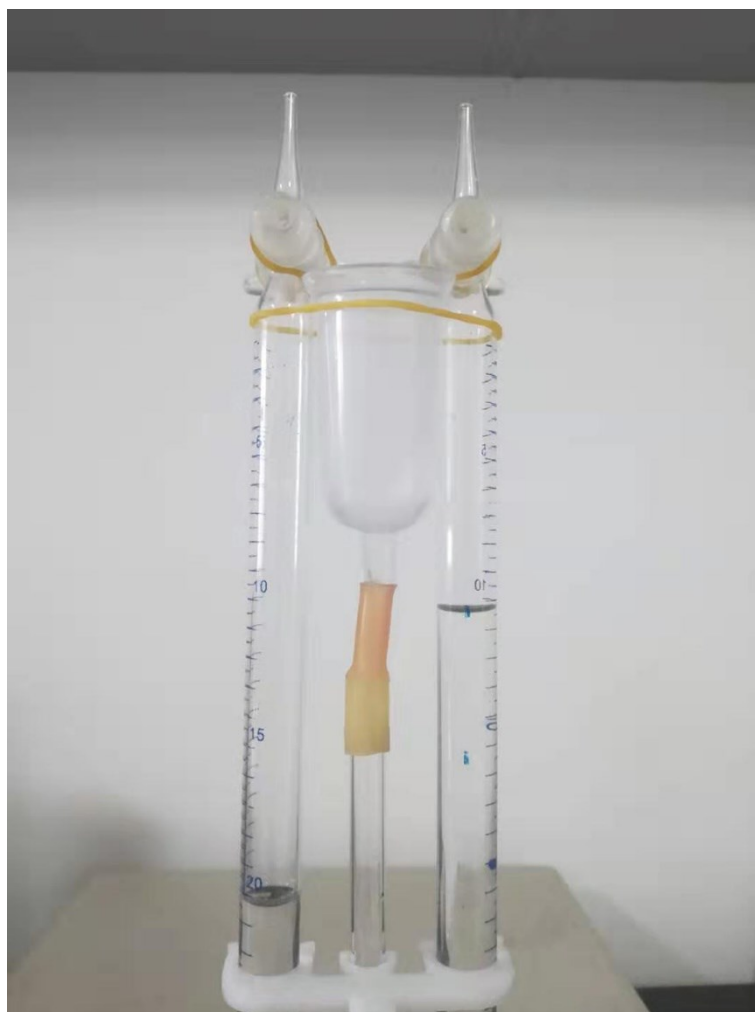

**Fig. S22** The optical picture of the measured setup of the Hoffman apparatus.

**Table S1.** Comparison of the OER performance of RuO<sub>2</sub>-NiO/NF with reported catalysts in 1 M KOH. \*The value is evaluated from the polarization curves exhibited in literature.

| Catalyst                           | Support                | $\eta_{10}$ ,<br>OER(mV) | $J_{1.55}$ ,<br>OER(mA cm <sup>-2</sup> ) | source               |
|------------------------------------|------------------------|--------------------------|-------------------------------------------|----------------------|
| <b>RuO<sub>2</sub>-NiO</b>         | <b>Nickel<br/>foam</b> | <b>187</b>               | <b>482</b>                                | <b>This<br/>work</b> |
| Ru/Cu-doped<br>RuO <sub>2</sub>    | Glassy<br>carbon       | 241                      | 110*                                      | 6                    |
| RuO <sub>2</sub> /N-C              | Glassy<br>carbon       | 280                      | 22*                                       | 7                    |
| RuO <sub>2</sub> /NiO              | Nickel<br>foam         | 250                      | 85*                                       | 8                    |
| IrO <sub>2</sub> @NiO              | Nickel<br>foam         | 278                      | 88*                                       | 9                    |
| NiO-Cr <sub>2</sub> O <sub>3</sub> | Glassy<br>carbon       | 270                      | 15*                                       | 10                   |
| NiO/CN                             | Glassy<br>carbon       | 261                      | 58*                                       | 11                   |
| CuFe                               | Nickel<br>foam         | 218                      | 203*                                      | 12                   |
| Ni/Ni(OH) <sub>2</sub>             | Carbon<br>paper        | 270                      | 45*                                       | 13                   |
| CoP-InNC@CNT                       | Glassy<br>carbon       | 270                      | 19*                                       | 14                   |
| Co-NCNTFs                          | Nickel<br>foam         | 230                      | 75*                                       | 15                   |
| IrRh NAs                           | Glassy<br>carbon       | 251                      | 31*                                       | 16                   |

**Table S2.** Comparison of the HER performance of RuO<sub>2</sub>-NiO/NF with recently reported catalysts in 1 M KOH. \*The value is evaluated from the polarization curves exhibited in literature.

| Catalyst                                | Support            | $\eta_{10, \text{HER}}(\text{mV})$ | $j_{100, \text{HER}}$<br>(mA cm <sup>-2</sup> ) | source           |
|-----------------------------------------|--------------------|------------------------------------|-------------------------------------------------|------------------|
| <b>RuO<sub>2</sub>-NiO</b>              | <b>Nickel foam</b> | <b>17</b>                          | <b>452</b>                                      | <b>This work</b> |
| Ru/Cu-doped RuO <sub>2</sub>            | Glassy carbon      | 28                                 | 72*                                             | 6                |
| RuO <sub>2</sub> /N-C                   | Glassy carbon      | 40                                 | 43*                                             | 7                |
| Ni@Ni <sub>2</sub> P-Ru                 | Glassy carbon      | 31                                 | 21*                                             | 17               |
| Ni(OH) <sub>2</sub> -NiMoO <sub>x</sub> | Nickel foam        | 36                                 | 75*                                             | 18               |
| Ru@NC                                   | Glassy carbon      | 27.5                               | 64*                                             | 19               |
| NiO NRs                                 | Carbon paper       | 110                                | 8*                                              | 20               |
| Fe-NiO                                  | Nickel foam        | 88                                 | 18*                                             | 21               |
| CuFe                                    | Nickel foam        | 158                                | 4*                                              | 12               |
| Ni/Ni(OH) <sub>2</sub>                  | Carbon paper       | 77                                 | 28*                                             | 13               |
| CoP-InNC@CNT                            | Glassy carbon      | 159                                | 3*                                              | 14               |
| Co-NCNTFs                               | Nickel foam        | 141                                | 7*                                              | 15               |
| Ni/NiO                                  | Glassy carbon      | 90                                 | 11*                                             | 22               |

**Table S3.** Comparison of the overall water splitting performance of RuO<sub>2</sub>-NiO/NF with recently reported bifunctional catalysts in 1 M KOH. \*The value is evaluated from the polarization curves exhibited in literature.

| Catalyst                                                      | Support            | $\eta_{10}$ ,<br>Overall(V) | $j_{1.7}$ , Overall<br>(mA cm <sup>-2</sup> ) | source           |
|---------------------------------------------------------------|--------------------|-----------------------------|-----------------------------------------------|------------------|
| <b>RuO<sub>2</sub>-NiO</b>                                    | <b>Nickel foam</b> | <b>1.43</b>                 | <b>631</b>                                    | <b>This work</b> |
| Ru/Cu-doped RuO <sub>2</sub>                                  | Glassy carbon      | 1.47                        | \                                             | 6                |
| RuO <sub>2</sub> /N-C                                         | Carbon paper       | 1.534                       | 33*                                           | 7                |
| RuO <sub>2</sub> /NiO                                         | Nickel foam        | 1.5                         | \                                             | 8                |
| Fe-NiO                                                        | Nickel foam        | 1.579                       | \                                             | 21               |
| PA-NiO                                                        | Nickel foam        | 1.56                        | 48*                                           | 23               |
| CuFe                                                          | Nickel foam        | 1.64                        | 16*                                           | 12               |
| Ni/Ni(OH) <sub>2</sub>                                        | Carbon paper       | 1.59                        | 60*                                           | 13               |
| CoP-InNC@CNT                                                  | Carbon cloth       | 1.58                        | 41*                                           | 14               |
| Co-NCNTFs                                                     | Nickel foam        | 1.62                        | 16*                                           | 15               |
| hcp-Co@NC                                                     | Carbon paper       | 1.58                        | 16*                                           | 24               |
| FeOOH/Ni <sub>3</sub> N                                       | Carbon cloth       | 1.56                        | 48*                                           | 25               |
| CoFe-CDs  CoFeRu@C                                            | Glassy carbon      | 1.59                        | 27*                                           | 26               |
| Ni(S <sub>0.61</sub> Se <sub>0.39</sub> ) <sub>2</sub> @PGCNS | Nickel foam        | 1.54                        | 113*                                          | 27               |
| NiO-GDY NC                                                    | Nickel foam        | 1.52                        | 248*                                          | 28               |
| Co-P-S                                                        | Nickel foam        | 1.6                         | 37*                                           | 29               |
| CoFe <sub>2</sub> O <sub>4</sub>                              | Carbon cloth       | 1.53                        | 57*                                           | 30               |
| MoS <sub>2</sub> /LDH                                         | Nickel foam        | 1.57                        | 42*                                           | 31               |
| IrRh NAs                                                      | Nickel foam        | 1.57                        | 24*                                           | 18               |
| Co <sub>0.75</sub> Ni <sub>0.25</sub> (OH) <sub>2</sub>       | Carbon paper       | 1.56                        | 41*                                           | 32               |
| NiVIr LDH                                                     | Nickel foam        | 1.49                        | 137                                           | 33               |
| MoS <sub>2</sub> /NiS <sub>2</sub>                            | Carbon cloth       | 1.59                        | 50                                            | 34               |
| Ni-Fe NP                                                      | Carbon paper       | 1.47                        | 48*                                           | 35               |



**Table S4.** Contents of Ru and Ni elements in the electrolyte after the water electrolysis at 1000 mA cm<sup>-2</sup> as determined by ICP-OES analysis.

| Sample         | Ru (ng/mL) | Ni (ng/mL) |
|----------------|------------|------------|
| Post 0-100 h   | 0.78       | 5.58       |
| Post 100-200 h | 0.58       | 5.68       |

## References

- 1 K. Li, Y. Li, Y. Wang, J. Ge, C. Liu, W. Xing, *Energ. Environ. Sci.* 2018, **11**, 1232-1239.
- 2 Z. J. Chen, G.-X. Cao, L. Y. Gan, H. Dai, N. Xu, M. J. Zang, H. B. Dai, H. Wu, P. Wang, *ACS Catal.* 2018, **8**, 8866-8872.
- 3 J. Qian, X. Bai, S. Xi, W. Xiao, D. Gao, J. Wang, *ACS Appl. Mater. Inter.* 2019, **11**, 30865-30871.
- 4 Y. Zheng, Y. Jiao, Y. Zhu, L. H. Li, Y. Han, Y. Chen, A. Du, M. Jaroniec, S. Z. Qiao, *Nat. Commun.* 2014, **5**, 1-8.
- 5 J. Rossmeisl, Z. W. Qu, H. Zhu, G. J. Kroes, J. K. Nørskov, *J. Electroanal. Chem.* 2007, **607**, 83-89.
- 6 K. Yang, P. Xu, Z. Lin, Y. Yang, P. Jiang, C. Wang, S. Liu, S. Gong, L. Hu, Q. Chen, *Small* 2018, **14**, 1803009.
- 7 C. Z. Yuan, Y. F. Jiang, Z. W. Zhao, S. J. Zhao, X. Zhou, T. Y. Cheang, A. W. Xu, *ACS Sustain. Chem. Eng.* 2018, **6**, 11529-11535.
- 8 J. Liu, Y. Zheng, Y. Jiao, Z. Wang, Z. Lu, A. Vasileff, S. Z. Qiao, *Small* 2018, **14**, 1704073.
- 9 J. Liu, Z. Wang, K. Su, D. Xu, D. Zhao, J. Li, H. Tong, D. Qian, C. Yang, Z. Lu, *ACS Appl. Mater. Inter.* 2019, **11**, 25854-25862.
- 10 X. Liu, J. Wu, *Electrochim. Acta* 2019, **320**, 134577.
- 11 C. Liao, B. Yang, N. Zhang, M. Liu, G. Chen, X. Jiang, G. Chen, J. Yang, X. Liu, T. S. Chan, *Adv. Funct. Mater.* 2019, **29**, 1904020.
- 12 A. I. Inamdar, H. S. Chavan, B. Hou, C. H. Lee, S. U. Lee, S. Cha, H. Kim, H. Im, *Small* 2020, **16**, 1905884.
- 13 L. Dai, Z. N. Chen, L. Li, P. Yin, Z. Liu, H. Zhang, *Adv. Mater.* 2020, **32**, 1906915.

- 14 L. Chai, Z. Hu, X. Wang, Y. Xu, L. Zhang, T. T. Li, Y. Hu, J. Qian, S. Huang, *Adv. Sci.* 2020, **7**, 1903195.
- 15 Q. Yuan, Y. Yu, Y. Gong, X. Bi, *ACS Appl. Mater. Inter.* 2020, **12**, 3592-3602.
- 16 C. Li, Y. Xu, S. Liu, S. Yin, H. Yu, Z. Wang, X. Li, L. Wang, H. Wang, *ACS Sustain. Chem. Eng.* 2019, **7**, 15747-15754.
- 17 Y. Liu, S. Liu, Y. Wang, Q. Zhang, L. Gu, S. Zhao, D. Xu, Y. Li, J. Bao, Z. Dai, *J. Am. Chem. Soc.* 2018, **140**, **8**, 2731-2734.
- 18 Z. Dong, F. Lin, Y. Yao, L. Jiao, *Adv. Energy Mater.* 2019, **9**, 1902703.
- 19 Y. Li, L. A. Zhang, Y. Qin, F. Chu, Y. Kong, Y. Tao, Y. Li, Y. Bu, D. Ding, M. Liu, *ACS Catal.* 2018, **8**, 5714-5720.
- 20 T. Zhang, M. Y. Wu, D. Y. Yan, J. Mao, H. Liu, W. B. Hu, X. W. Du, T. Ling, S. Z. Qiao, *Nano Energy* 2018, **43**, 103-109.
- 21 Z. Wu, Z. Zou, J. Huang, F. Gao, *J Catal.* 2018, **358**, 243-252.
- 22 L. Zhao, Y. Zhang, Z. Zhao, Q. Zhang L. Huang, L. Gu, G. Lu, J. Hu, L. Wan, *Natl. Sci. Rev.* 2020, **7**, 27-36.
- 23 Z. Li, W. Niu, L. Zhou, Y. Yang, *ACS Energy Lett.* 2018, **3**, 892-898.
- 24 N. Li, H. Tan, X. Ding, H. Duan, W. Hu, G. Li, Q. Ji, Y. Lu, Y. Wang, F. Hu, *Appl. Catal. B: Environ.* 2020, **266**, 118621.
- 25 J. Guan, C. Li, J. Zhao, Y. Yang, W. Zhou, Y. Wang, G. R. Li, *Appl. Catal. B: Environ.* 2020, **269**, 118600.
- 26 M. Yang, T. Feng, Y. Chen, J. Liu, X. Zhao, B. Yang, *Appl. Catal. B: Environ.* 2020, **267**, 118657.
- 27 Y. Zhou, Y. Wang, H. Zhao, J. Su, H. Zhang, Y. Wang, *J. Catal.* 2020, **381**, 84-95.
- 28 H. Yu, Y. Xue, L. Hui, F. He, C. Zhang, Y. Liu, Y. Fang, C. Xing, Y. Li, H. Liu, *Nano Energy* 2019, **64**, 103928.

- 29 F. Du, Y. Zhang, H. He, T. Li, G. Wen, Y. Zhou, Z. Zou, *J. Power Sources* 2019, **431**, 182-188.
- 30 C. Guo, X. Liu, L. Gao, X. Ma, M. Zhao, J. Zhou, X. Kuang, W. Deng, X. Sun, Q. Wei, *J. Mater. Chem. A* 2019, **7**, 21704-21710.
- 31 P. Xiong, X. Zhang, H. Wan, S. Wang, Y. Zhao, J. Zhang, D. Zhou, W. Gao, R. Ma, T. Sasaki, *Nano lett.* 2019, **19**, 4518-4526.
- 32 X. Wang, Z. Li, D. Y. Wu, G. R. Shen, C. Zou, Y. Feng, H. Liu, C. K. Dong, X. W. Du, *Small* 2019, **15**, 1804832.
- 33 S. Li, C. Xi, Y.-Z. Jin, D. Wu, J.-Q. Wang, T. Liu, H.-B. Wang, C.-K. Dong, H. Liu, S. A. Kulinich, *ACS Energy Lett.* 2019, **4**, 1823-1829.
- 34 J. Lin, P. Wang, H. Wang, C. Li, X. Si, J. Qi, J. Cao, Z. Zhong, W. Fei, J. Feng, *Adv. Sci.* 2019, **6**, 1900246.
- 35 B. H. Suryanto, Y. Wang, R. K. Hocking, W. Adamson, C. Zhao, *Nat. Commun.* 2019, **10**, 1-10.
